# Supplementary material
Source: PubMed Central journal article supplement (PMC4509966)

## **Supplementary Figures.**

**Supplementary Figure 1.** Cumulative data and representative western blot showing the expression of D1R protein and internal control, GAPDH, in tissue punches of caudate-putamen harvested 5 and 15 minutes after the challenge injection on day 8 from *drd1a*-EGFP mice that were binge-treated with 15 mg/kg cocaine for 7 days and challenged with saline (cocaine/saline) or 15 mg/kg cocaine (cocaine/cocaine). The molecular weight (kD) of D1R and GAPDH detected by the antibodies are indicated. Error bars represent  $\pm$  SEM.

**Supplementary Figure 2.** Representative western blot showing the expression of D1R protein and internal control, GAPDH, in tissue punches of nucleus accumbens harvested 30 minute after the challenge injection on day 8 from *drd1a*-EGFP mice that were binge-treated with saline for 7 days and challenged with saline (saline/saline) or 15 mg/kg cocaine (saline/cocaine) or binge-treated with 15 mg/kg cocaine for 7 days and challenged with saline (cocaine/saline) or 15 mg/kg cocaine (cocaine/cocaine). The molecular weight (kD) of D1R and GAPDH detected by the antibodies are indicated.

# Supplementary Figure 1

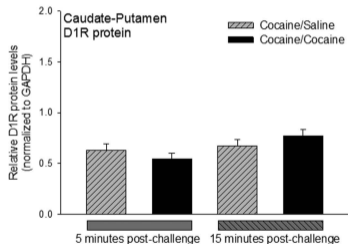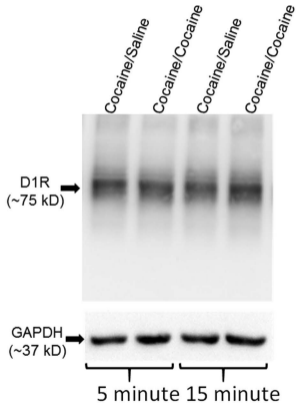

## Supplementary Figure 2

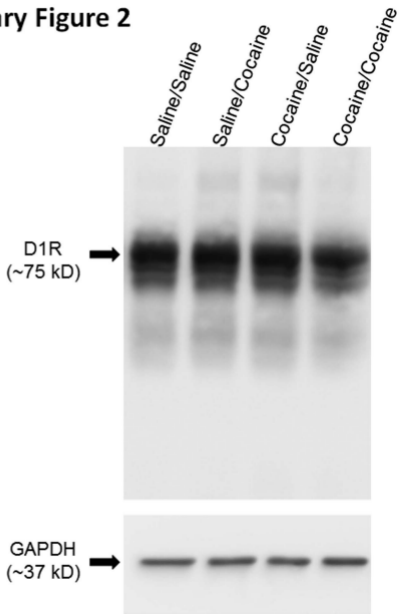

Supplement: NIHMS684125-supplement-Supp_FigureS1-S2.pdf [file NIHMS684125-supplement-Supp_FigureS1-S2.pdf]
